# Supplementary material for: Altered Mitochondrial Function, Mitochondrial DNA and Reduced Metabolic Flexibility in Patients With Diabetic Nephropathy
Source: PubMed Central journal article supplement — eBioMedicine. 2015 Apr 11;2(6):499–512. doi: 10.1016/j.ebiom.2015.04.002 (PMC4534759; doi:10.1016/j.ebiom.2015.04.002), 2015-04-11
Supplement: mmc1.pdf [file mmc1.pdf]

## **Supplementary Data**

**Table S1. Baseline characteristics of healthy controls and diabetic patients**

| Variable                                          | Healthy controls (HC) (n=39) | Diabetic patients (DM) (n=128) |
|---------------------------------------------------|------------------------------|--------------------------------|
| Type of Diabetes (T1D:T2D)                        | NR                           | 58:70                          |
| Age (years)                                       | 52 ± 25                      | 57±15                          |
| Gender (female:male)                              | 20:19                        | 65:63                          |
| Diabetes duration (years)                         | NR                           | 22 ± 10                        |
| BMI (kg/m <sup>2</sup> )                          | 23 ± 4                       | 27 ± 4***                      |
| HbA <sub>1c</sub> (%)                             | ND                           | 10 ± 9                         |
| ACR (mg/mmol)                                     | ND                           | 12 ± 41                        |
| eGFR (ml min <sup>-1</sup> 1.73 m <sup>-2</sup> ) | ND                           | 78 ± 35                        |
| Systolic BP (mmHg)                                | ND                           | 129 ± 16                       |
| Diastolic BP (mmHg)                               | ND                           | 72 ± 9                         |
| Cholesterol (mmol/l)                              | ND                           | 4 ± 0.08                       |
| MtDNA content (Mean ± SD)                         | 34 ± 9                       | 51 ±62                         |
| MtDNA (Median)                                    | 32 (35)                      | 32(475)                        |

Foot note: <sup>a</sup> NR: not required, <sup>b</sup> ND; not detected, <sup>c</sup> BMI: body mass index, BP: blood pressure, HbA<sub>1c</sub>: Haemoglobin A1c, ACR: albumin/creatinine ratio, GFR: glomerular filtration rate. <sup>d</sup> Data are means ±SD. <sup>e</sup> \*\*\*P<0.001 compared with healthy controls

**Table S2: Baseline characteristics of patients and healthy controls used in Seahorse subset showing a similar trend to the whole study group as in Table 1**

| Variable                                          | Healthy controls<br>(HC, n=13) | Diabetic controls<br>(DC, n=14) | Diabetic Nephropathy<br>(DN, n=16) |
|---------------------------------------------------|--------------------------------|---------------------------------|------------------------------------|
| Type of Diabetes (T1D:T2D)                        | NR                             | 11:3                            | 6:10                               |
| Age (years)                                       | 33±10                          | 46.4±6.9                        | 55.8±15.2                          |
| Gender (female:male)                              | 8:5                            | 9:6                             | 7:8                                |
| Diabetes duration (years)                         | NR                             | 24.8 ± 3.5                      | 22 ± 10                            |
| BMI (kg/m <sup>2</sup> )                          | 23.2±2.9                       | 24.7 ± 12                       | 28.3 ± 4.8                         |
| HbA <sub>1c</sub> (%)                             | ND                             | 8.8 ± 1.9                       | 8.7 ± 1.5                          |
| ACR (mg/mmol)                                     | ND                             | 1.3 ± 2                         | 23± 36 <sup>*</sup>                |
| eGFR (ml min <sup>-1</sup> 1.73 m <sup>-2</sup> ) | ND                             | 120 ± 20                        | 64 ± 34 <sup>**</sup>              |
| Systolic BP (mmHg)                                | ND                             | 116 ±19.6                       | 131 ±23                            |
| Diastolic BP (mmHg)                               | ND                             | 74.4±15                         | 76±10                              |
| Cholesterol (mmol/l)                              | ND                             | 4.5 ±1.0                        | 4.2 ± 1.2                          |
| MtDNA content (Mean± D)                           | 33.5±8.1                       | 40.2±20.5                       | 24.8±10.0 <sup>**#</sup>           |
| BHI                                               | 3.2±0.5                        | 4.0 ±1.3                        | 3±0.4 <sup>*</sup>                 |

Foot note: <sup>a</sup> BMI: body mass index, BP: blood pressure, HbA<sub>1c</sub>: Haemoglobin A1c, ACR: albumin/creatinine ratio, GFR: glomerular filtration rate. <sup>b</sup> Data are means ±SD. <sup>c</sup> \*P<0.05, \*\*P<0.01 compared with diabetic controls, <sup>d</sup> # P <0.05, compared with healthy controls

**Table S3. Human Oligonucleotide primers used in this study**

| Gene                                            | Accession number | Primers (5'->3')               | Amplicon Length (bp) |
|-------------------------------------------------|------------------|--------------------------------|----------------------|
| <i>TFAM</i>                                     | NM_003201.2      | F: GAACAAC TACCCATATTTAAAGCTCA | 95                   |
|                                                 |                  | R: GAATCAGGAAGTTCCTCCA         |                      |
| <i>PGC1a</i>                                    | NM_013261.3      | F: ACTGCAGGCCTAACTCCACCCA      | 190                  |
|                                                 |                  | R: ACTCGGATTGCTCCGGCCCT        |                      |
| <i>NFkB p65</i>                                 | NM_021975.3      | F: CCTGGAGCAGGCTATCAGTC        | 213                  |
|                                                 |                  | R: ATCTTGAGCTCGGCAGTGTT        |                      |
| <i>MYD88</i>                                    | NM_001172567.1   | F: TTTGCACTCAGCCTCTCTCC        | 121                  |
|                                                 |                  | GGTTGGTGTAGTCGCAGACA           |                      |
| <i>MFN1</i>                                     | NM_033540.2      | F: GAGAAAATACAAAACAATTCAAAGCTC | 96                   |
|                                                 |                  | R:GCTTGAAGGTAGAAACTGCTTAGTAAA  |                      |
| <i>MFN2</i>                                     | NM_014874.3      | F: AGCCACCAAGTCCAGCAG          | 117                  |
|                                                 |                  | R: AACCTCAATTTTCTTGTTCATGG     |                      |
| <i>OPA1</i>                                     | NM_015560.2      | F: GAGCCAGGTTACACAAAACA        | 120                  |
|                                                 |                  | R: GTTCCTGAATTCATGGTCTGC       |                      |
| <i>Pink1</i>                                    | NM_032409.2      | F: CTTACAGAAAATCCAAGAGAGG      | 199                  |
|                                                 |                  | R: CAGGGATAGTTCTTCATAACG       |                      |
| <i>Park2</i>                                    | NM_004562.2      | F: GAGGATTTAACCCAGGAGAG        | 113                  |
|                                                 |                  | R: ACAAACACTATCATGGTCAC        |                      |
| <i>Drp1</i>                                     | NM_012063.3      | F: TCACGAGACAAGTTAATTCAGGA     | 344                  |
|                                                 |                  | R: GCCTTTGGCACACTGTCTTG        |                      |
| <i>ND1<sup>a</sup></i>                          | NC_012920.1      | F: GAGCAGTAGCCAAACAATCTC       | 140                  |
|                                                 |                  | R: GGGTCATGATGGCAGGAGTAAT      |                      |
| <i>ND6<sup>a</sup></i>                          | NC_012920.1      | F: TGGGGTTAGCGATGGAGGTAGG      | 140                  |
|                                                 |                  | R: AATAGGATCCTCCGAATCAAC       |                      |
| <i>COX3<sup>a</sup></i>                         | NC_012920.1      | F: TCCTCACTATCTGCTTCATCCG      | 140                  |
|                                                 |                  | R: CCCTCATCAATAGATGGAGACA      |                      |
| <i><math>\beta</math>-actin</i>                 | NM_001101.3      | F: GACGACATGGAGAAAATCTG        | 131                  |
|                                                 |                  | R: ATGATCTGGGTCATCTTCTC        |                      |
| <i>hMito</i>                                    | NC_012920.1      | F: CACTTCCACACAGACATCA         | 127                  |
|                                                 |                  | R: TGTTAGGCTGGTGTAGGG          |                      |
| <i>hB2M</i>                                     | NC_000015.10     | F: TGTTCTGCTGGGTAGCTCT         | 187                  |
|                                                 |                  | R: CCTCCATGATGCTGCTTACA        |                      |
| <i>Mito primer<sup>b</sup><br/>(damage)</i>     | J01415           | F: TCTAAGCCTCCTTATTCGAGCCGA    | 8 900                |
|                                                 |                  | R: TTTCATCATGCGGAGATGTTGGATGG  |                      |
| <i>Mito amplicon<br/>A (damage)<sup>c</sup></i> | NC_013993.1      | F:GATCACAGGTCTATCACCCCTA       | 2027                 |
|                                                 |                  | R: TTGGACAACCAGCTATCACCA       |                      |

Footnote: <sup>a</sup> Nagao et al., 2008, <sup>b</sup> Furda, A., et al., 2006, <sup>c</sup> Bannwarth et al., 2006

**Table S4: Raw values of data for calculation of BHI**

| Group | Reserve Capacity | ATP-linked | Non-Mitochondrial | Proton leak | BHI (Untransformed) | BHI |
|-------|------------------|------------|-------------------|-------------|---------------------|-----|
| HC1   | 95               | 31         | 12                | 3           | 719                 | 2.9 |
| HC2   | 116              | 28         | 14                | 6           | 1360                | 3.1 |
| HC3   | 75               | 39         | 21                | 2           | 242                 | 2.4 |
| HC4   | 180              | 37         | 16                | 10          | 4137                | 3.6 |
| HC5   | 84               | 24         | 7                 | 11          | 3228                | 3.5 |
| HC6   | 144              | 23         | 4                 | 10          | 8229                | 3.9 |
| HC7   | 101              | 33         | 10                | 9           | 3161                | 3.5 |
| HC8   | 64               | 26         | 12                | 8           | 1109                | 3.0 |
| Mean  | 107              | 30         | 12                | 7           | 2773                | 3.2 |

| Group | Reserve Capacity | ATP-linked | Non-Mitochondrial | Proton leak | BHI (Untransformed) | BHI |
|-------|------------------|------------|-------------------|-------------|---------------------|-----|
| DC1   | 185              | 4          | 20                | 44          | 1795                | 3.3 |
| DC2   | 218              | 55         | 26                | 13          | 5731                | 3.8 |
| DC3   | 147              | 33         | 14                | 6           | 1989                | 3.3 |
| DC4   | 140              | 14         | 20                | 26          | 2634                | 3.4 |
| DC5   | 104              | 30         | 12                | 11          | 2701                | 3.4 |
| Mean  | 159              | 27         | 18                | 20          | 2970                | 3.4 |

| Group | Reserve Capacity | ATP-linked | Non-Mitochondrial | Proton leak | BHI (Untransformed) | BHI |
|-------|------------------|------------|-------------------|-------------|---------------------|-----|
| DN1   | 131              | 45         | 27                | 0           | 101                 | 2.0 |
| DN2   | 58               | 27         | 15                | 9           | 861                 | 2.9 |
| DN3   | 70               | 41         | 14                | 4           | 791                 | 2.9 |
| DN4   | 33               | 17         | 4                 | 7           | 965                 | 3.0 |
| DN5   | 135              | 38         | 22                | 3           | 690                 | 2.8 |
| DN6   | 69               | 23         | 11                | 6           | 790                 | 2.9 |
| DN7   | 106              | 31         | 18                | 29          | 5305                | 3.7 |
| DN8   | 60               | 33         | 17                | 10          | 1143                | 3.1 |
| DN9   | 68               | 42         | 22                | 11          | 1489                | 3.2 |
| DN10  | 67               | 38         | 19                | 13          | 1716                | 3.2 |
| DN11  | 130              | 45         | 21                | 8           | 2372                | 3.4 |
| DN12  | 61               | 27         | 9                 | 5           | 910                 | 3.0 |
| Mean  | 82               | 34         | 17                | 9           | 1428                | 3.0 |

**Table S5: MtDNA content of patients by sub-dividing as type 1 and type 2 diabetes**

|                                                | <b>Healthy Control<br/>(HC)</b> | <b>Diabetic Control<br/>(DC)</b>  | <b>Diabetic Nephropathy<br/>(DN)</b> |
|------------------------------------------------|---------------------------------|-----------------------------------|--------------------------------------|
| MtDNA content<br>(Type 1 + Type 2<br>Diabetes) | N=39<br><br>34 ± 9              | N=45<br><br>64 ± 75 <sup>##</sup> | N=83<br><br>43 ± 52 <sup>***</sup>   |
| Type 1 diabetes<br>MtDNA content               |                                 | N=27<br><br>64 ± 87 <sup>#</sup>  | N=31<br><br>33 ± 37 <sup>**</sup>    |
| Type 2 diabetes<br>MtDNA content               |                                 | N=18<br><br>65 ± 54               | N=52<br><br>49 ± 58                  |

**Foot note:** <sup>a</sup> Non-parametric analysis was done by Kruskal –Wallis test and groups were compared with Mann-Whitney with Bonferroni correction. Data are means ±SD, <sup>b\*\*</sup>  $p < 0.01$  and <sup>\*\*\*</sup>  $p < 0.001$  compared with diabetic controls, <sup>c #</sup>  $p < 0.05$  and <sup>##</sup>  $p < 0.01$  compared with healthy controls
